# Supplementary material for: Theranostic 3-Dimensional nano brain-implant for prolonged and localized treatment of recurrent glioma
Source: PubMed Central journal article supplement (PMC5338016; doi:10.1038/srep43271), 2017-03-06
Supplement: srep43271-s1.pdf [file srep43271-s1.pdf]

## Supporting Information

# Theragnostic 3-Dimensional nano brain-implant for prolonged and localized treatment of recurrent glioma

*Ranjith Ramachandran, <sup>1</sup>Vijayabhaskar Reddy Junnuthula, <sup>1</sup>G Siddaramana Gowd, <sup>1</sup>Anusha Ashokan, <sup>1</sup>John Thomas<sup>1</sup>, Reshmi P,<sup>2</sup>Anoop Thomas,<sup>3</sup>Ayalur Kodakara Kochugovindan Unni<sup>2</sup> Dilip Panikar<sup>3#</sup>, Shantikumar V Nair<sup>1\*</sup> and ManzoorKoyakutty<sup>1\*</sup>*

<sup>1</sup>Amrita Centre for Nanosciences and Molecular Medicine

<sup>2</sup>Central Lab Animal Facility, Amrita Institute of Medical Sciences& Research Centre

<sup>3</sup>Department of Neurosurgery, Amrita Institute of Medical Sciences& Research Centre  
Amrita Vishwa Vidyapeetham, Amrita University, Kochi, 682041, Kerala, India,

## **Methods**

### ***In vitro* cytotoxicity assays**

Cytotoxic potentials of TMZ loaded electrospun wafers were studied using MTT assay. Briefly,  $1 \times 10^5$  U87MG cells were seeded in T75 flasks and incubated for 24 h. After incubation the media were replaced and added with 5 mg of TMZ-FR wafers. Bare wafer and pure drug treated control groups were also maintained. Cell viability after 96 h was determined by MTT assay (Sigma, St. Louis, USA). For determining cell growth response, bare and TMZ loaded wafers were seeded with  $2 \times 10^4$  cells and allowed to attach and grow for 96 h. SEM imaging of the scaffolds were taken after glutaraldehyde fixation (2%). The functional validation of the same was done using live dead assay. The cells after treatment with different wafers were allowed to incubate with calcein-AM and ethidium homodimer-1 mix as per manufacturer's instructions (Life technologies™, Invitrogen). The wafers were then imaged for the green fluorescence of calcein-AM (indicating live cells) and red fluorescence of ethidium homodimer-1 (indicating dead cells) using a confocal microscope (TCS SP5, Leica Germany). For determining the mechanism of cytotoxicity,  $2.5 \times 10^5$  cells were treated with TMZ wafer, bare wafer, camptothecin (positive control) and media (negative control). The cells were harvested after 96 h, washed and treated with Annexin V FITC and PI cocktail as per manufacturer's instructions (Invitrogen, Cat. No. V13245) and analyzed using flowcytometer (FACS Aria II, BD USA).

### **Systemic side-effect assessment of TMZ loaded PLA-PLGA wafers**

Blood samples were collected at 1 and 3 months after wafer implantation (bare or TMZ-wafer). The hematological parameters (Total counts, Differential Counts and Platelets) were analyzed to determine the systemic toxicities.

## Results

**Table S1.** Different polymer blends used for making nano-fiber library.

| Sample ID | Composition  | Glycolide:<br>Lactide:<br>Caprolactone<br>ratio | Drug<br>Loading<br>(wt%) | Voltage<br>(kV) | Flow<br>rate<br>(ml/h) | Humidity<br>(%) | Average<br>Fibre<br>Dia.(nm) | Encapsulation<br>Efficiency<br>(%) | Effective<br>Drug<br>loading<br>(wt %) |
|-----------|--------------|-------------------------------------------------|--------------------------|-----------------|------------------------|-----------------|------------------------------|------------------------------------|----------------------------------------|
| W1        | PLGA 50:50   | 1:1:0                                           | 20                       | 18              | 0.75-<br>1             | 55-60           | 400-600                      | 96.6                               | 19.3                                   |
| W2        | PLGA 75:25   | 3:1:0                                           | 20                       | 18              | 0.75-<br>1.25          | 55-60           | 400-600                      | 92.7                               | 18.5                                   |
| W3        | PLGA 85:15   | 5.6:1                                           | 20                       | 15              | 1.5-2                  | 55-60           | 400-600                      | 96.5                               | 19.3                                   |
| W4        | PLGA :PLA    | 6.1:1:0                                         | 20                       | 15              | 1.5-2                  | 55-60           | 800-<br>1000                 | 94.2                               | 18.8                                   |
| W5        | PLGA:PLA     | 8.1:1:0                                         | 20                       | 18              | 1-1.5                  | 55-60           | 800-<br>1000                 | 95.9                               | 19.2                                   |
| W6        | PLGA:PLA:PCL | 6.7:1:0.5                                       | 20                       | 15-18           | 1-2                    | 55-60           | 800-<br>1000                 | 94.4                               | 18.9                                   |
| W7        | PLGA:PLA:PCL | 9:1:1                                           | 20                       | 15-18           | 1-2                    | 55-60           | 800-<br>1000                 | 95.7                               | 19.1                                   |
| W8        | PLGA:PLA:PCL | 10.1:1:1                                        | 20                       | 15-18           | 1-2                    | 55-60           | 800-<br>1000                 | 94.1                               | 18.8                                   |
| W9        | PLGA:PLA:PCL | 21.8:2.2:1                                      | 20                       | 15-18           | 2                      | 55-60           | 800-<br>1000                 | 92.9                               | 18.6                                   |
| W10       | PLGA:PLA:PCL | 30.7:1:1.7                                      | 20                       | 15-18           | 2                      | 55-60           | 800-<br>1000                 | 92.7                               | 18.5                                   |
| W11       | PLGA:PLA:PCL | 10.2:1:1.2                                      | 20                       | 15-18           | 1.75-<br>2.5           | 55-60           | 800-<br>1000                 | 94.5                               | 18.9                                   |

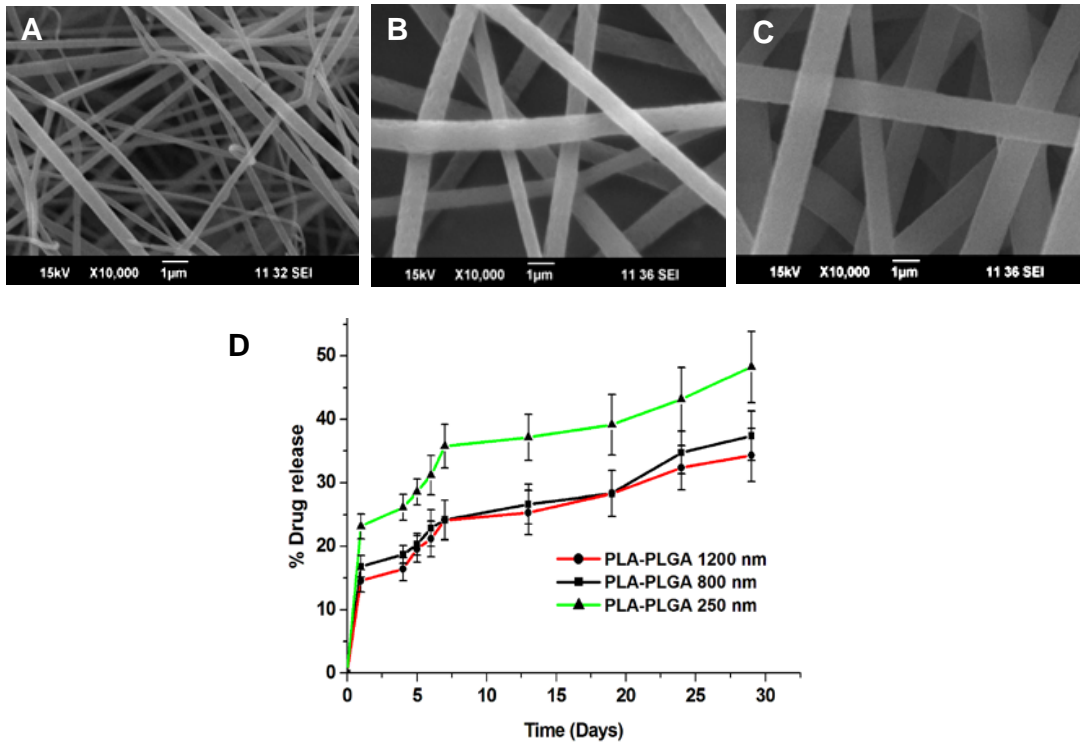

**Figure S1** Effect of fiber diameter on TMZ release. SEM images of 20 wt% TMZ loaded wafers having average fiber diameter of (A) 250 nm, (B) 800 nm and (C) 1200 nm. (D) Graph showing the *in vitro* release profile of 20 wt% TMZ loaded wafers. The wafers made of 250nm nano-fibers released TMZ faster compared to 800 and 1200 nm fibers.

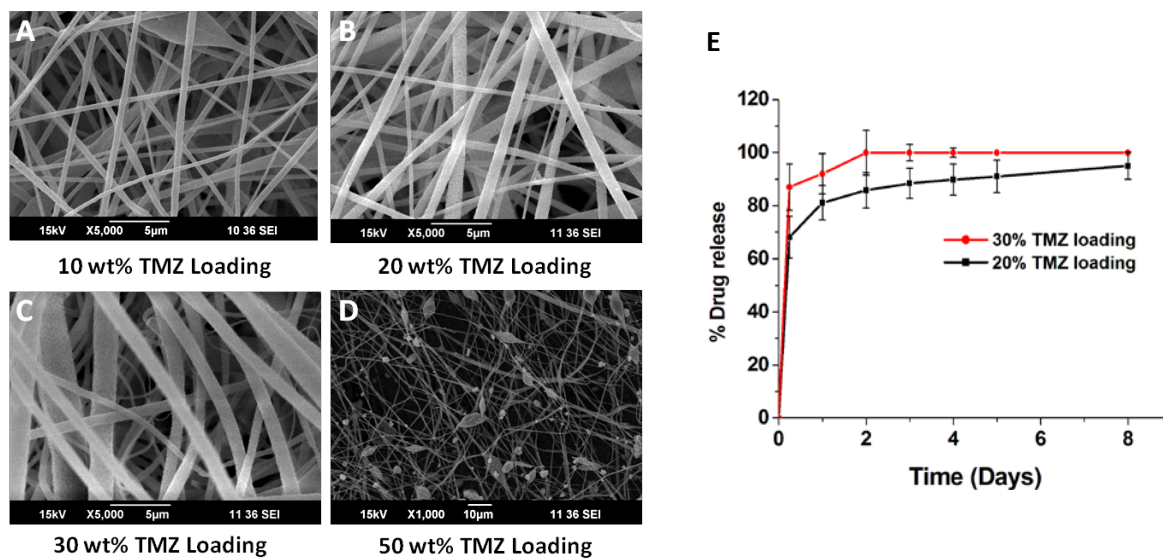

**Figure S2** A-D) SEM images showing micro-morphology of TMZ loaded PLGA-PLA wafers at different drug loading (10-50 wt%). E) Changes in the drug release pattern with increase in drug loading from 20 to 30 wt%.

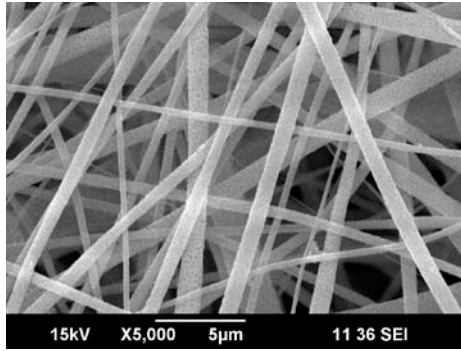

**Figure S3.** SEM image of nCP:Fe loaded theranostic wafer showing smooth micro-morphology without any bead formation.

**Table S2.** Haematological parameters of TMZ-SF wafer implanted animals.

|                                    | Normal<br>Range | Untreated<br>Control | TMZ-SR<br>wafer<br>implanted<br>animals |                       |
|------------------------------------|-----------------|----------------------|-----------------------------------------|-----------------------|
|                                    |                 |                      |                                         | 1 Month      3 Months |
| RBC ( $10^6/\text{mm}^3$ )         | 6.67 – 9.75     | $9.3 \pm 0.6$        | $8.5 \pm 1$                             | $6.7 \pm 1$           |
| WBC ( $10^3/\text{mm}^3$ )         | 6.6 – 12.6      | $12.1 \pm 3.5$       | $10.5 \pm 3.5$                          | $12.3 \pm 0.1$        |
| Platelet ( $10^3/\text{mL}$ )      | 150 – 460       | $348 \pm 53$         | $140 \pm 14$                            | $490 \pm 57$          |
| Neutrophils ( $10^3/\text{mm}^3$ ) | 1.77 – 3.38     | $2.6 \pm 0.6$        | $3 \pm 1.3$                             | $2.8 \pm 0.1$         |
| Lymphocytes ( $10^3/\text{mm}^3$ ) | 4.78 – 9.12     | $9.9 \pm 0.7$        | $7.5 \pm 1.3$                           | $9.5 \pm 0.1$         |

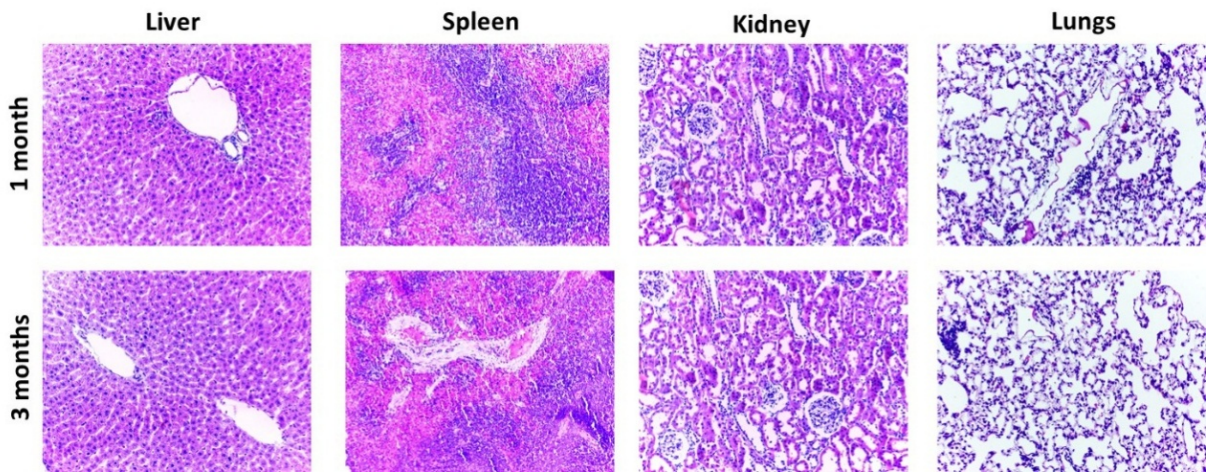

**Figure S4.** H&E stained sections of liver, spleen, kidney and lungs of rats implanted with TMZ-SR wafers at 1 and 3 months, showing no organ toxicity.



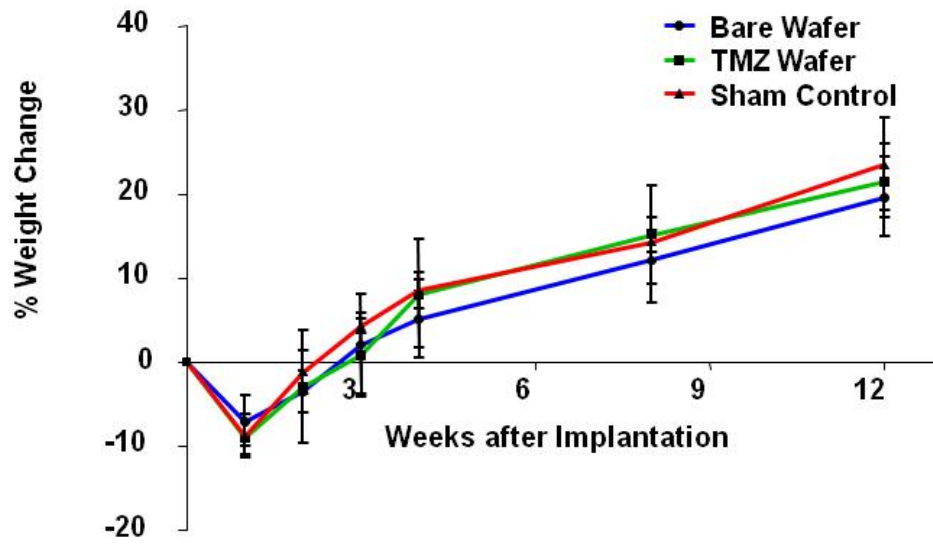

**Figure S5.** Graph showing body weight changes following implantation of nano-fiber wafer implant in brain cortex.

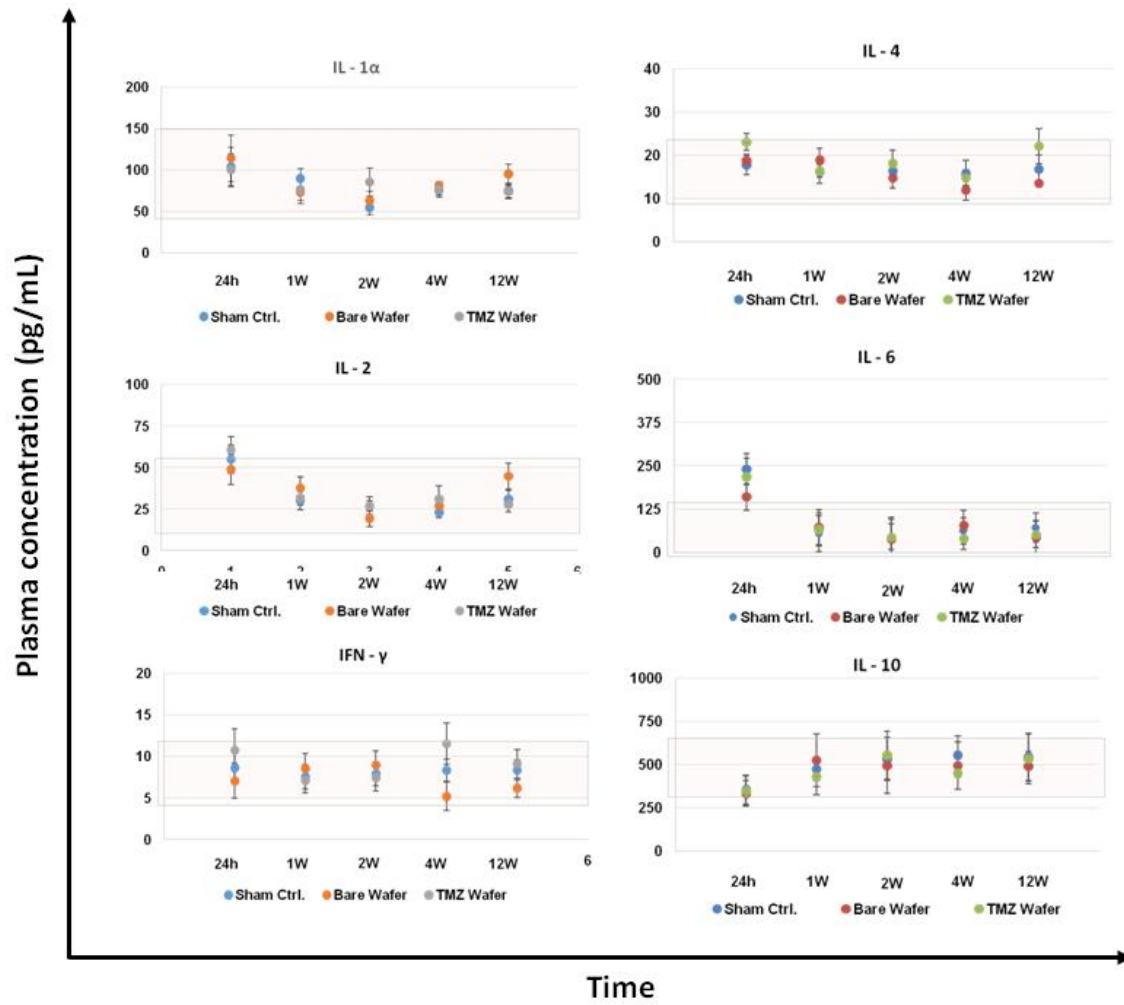

**Figure S6.** Plasma cytokine levels of sham, bare wafer and TMZ-SR wafer implanted animals at different time intervals (h = hour, W = week).

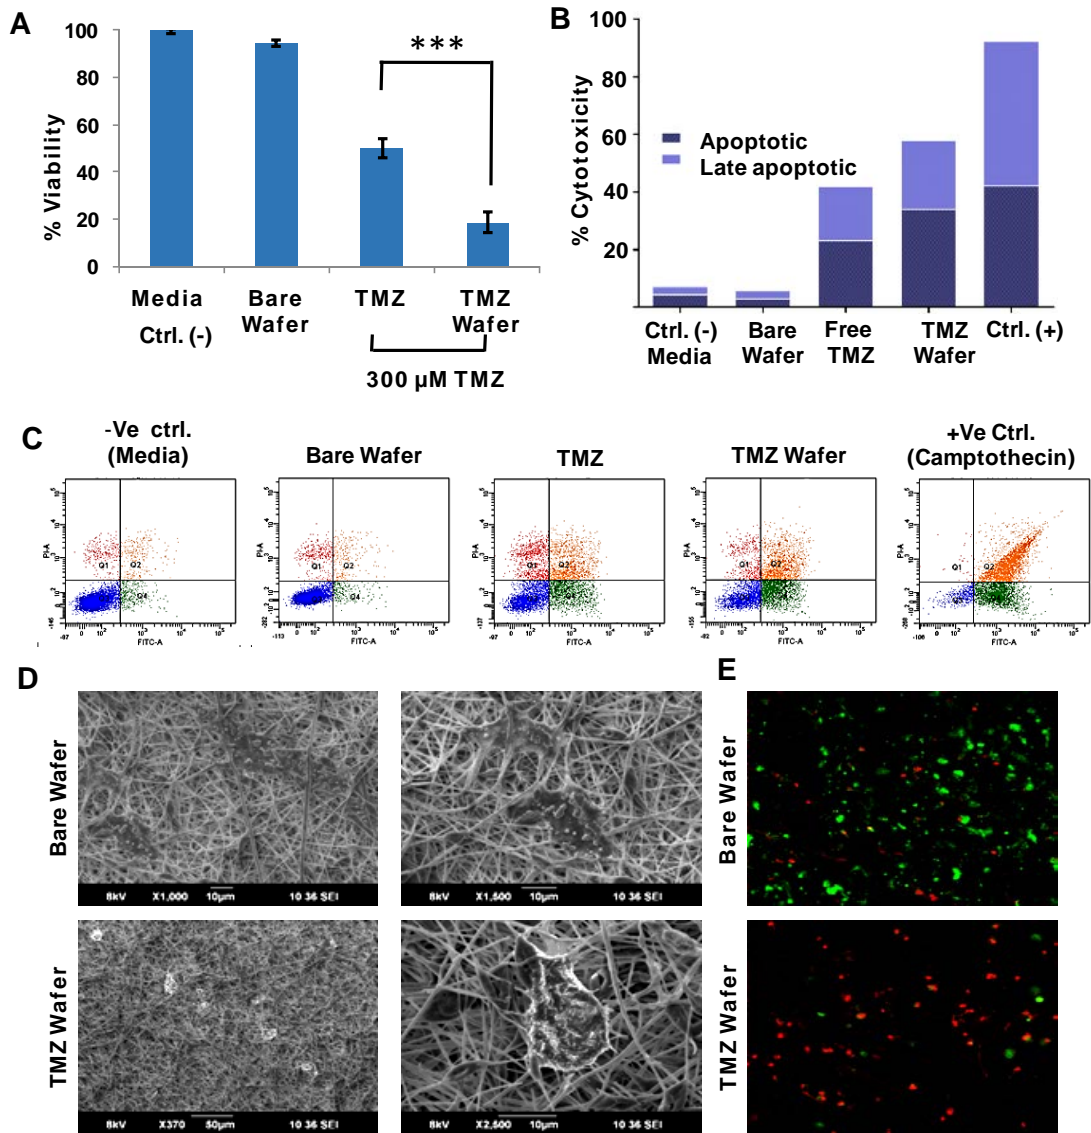

**Figure S7. *In vitro* cytotoxicity evaluation of TMZ wafers in U87MG human glioma.** (A) Graph showing enhanced cytotoxicity (81.5%) induced by TMZ-FR wafer compared to free TMZ (50.5%) as determined by MTT assay after 96 h treatment. (B) Graph and (C) dot blots depicting the flowcytometry results showing enhanced cell death in TMZ-FR wafer treated glioma cells at 96 h. 57.7% cells underwent apoptosis when treated with TMZ-FR compared to 41.7% in free-TMZ (D) SEM images of glioma cells on bare wafers (no drug) and TMZ-FR wafer showing impaired cell growth in the later (E) Confocal images of live-dead assay showing live glioma cells (green) in bare wafer and dead cells (red) in the TMZ-FR wafer.

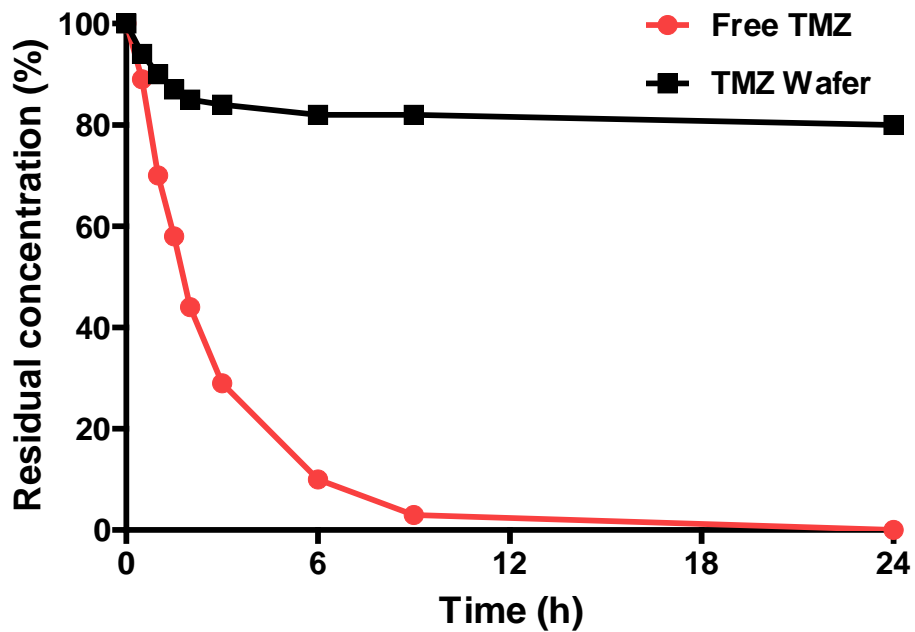

**Figure S8. Degradation of free and wafer loaded TMZ in complete medium.** Almost 100% free-TMZ was found decomposed by 9 h in serum whereas ~ 80% of TMZ remained intact in TMZ-FR implant, indicating the improved stability of TMZ by polymer encapsulation.

**Video S1:** Animal after three days of wafer implantation

**Video S2:** Animal after three months of wafer implantation
